# Supplementary material for: 5-Aza-2′-Deoxycytidine (5-Aza-dC, Decitabine) Inhibits Collagen Type I and III Expression in TGF-β1-Treated Equine Endometrial Fibroblasts
Source: MDPI journal article supplement (doi:10.3390/ani13071212), 2023-03-30
Supplement: s1 [file s1]

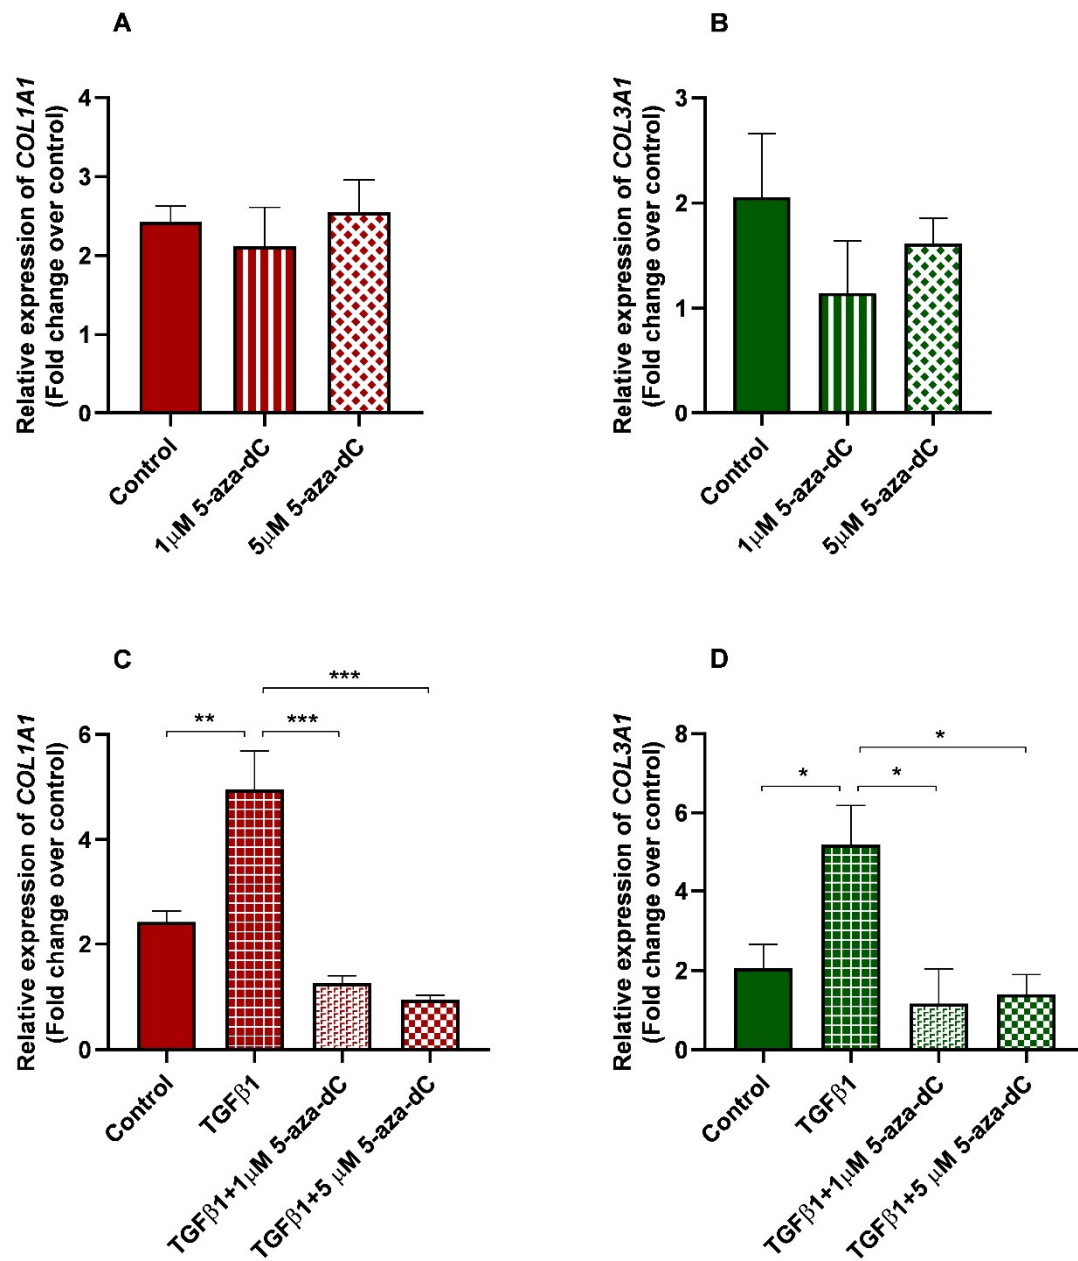

**Figure S1.** Relative levels of **A)** collagen type I (*COL1A1*), **B)** collagen type III (*COL3A1*) mRNA in endometrial fibroblasts treated with 1  $\mu$ M, 5  $\mu$ M of 5-aza-dC or untreated fibroblasts (control), **C)** collagen type I (*COL1A1*) and **D)** collagen type III (*COL3A1*) mRNA in non-treated (control) endometrial fibroblasts or treated with TGF- $\beta$ 1 (10ng/mL), (1  $\mu$ M), TGF- $\beta$ 1 (10ng/mL) + 1  $\mu$ M 5aza-dC or TGF- $\beta$ 1 (10ng/mL) + 5  $\mu$ M 5aza-dC;  $n=4$ . Bars represent mean  $\pm$  SEM. Asterisks indicate significant differences between treatments (\* $P<0.05$ , \*\*  $P<0.01$ , \*\*\*  $P<0.001$ ).

## 1st Protocol

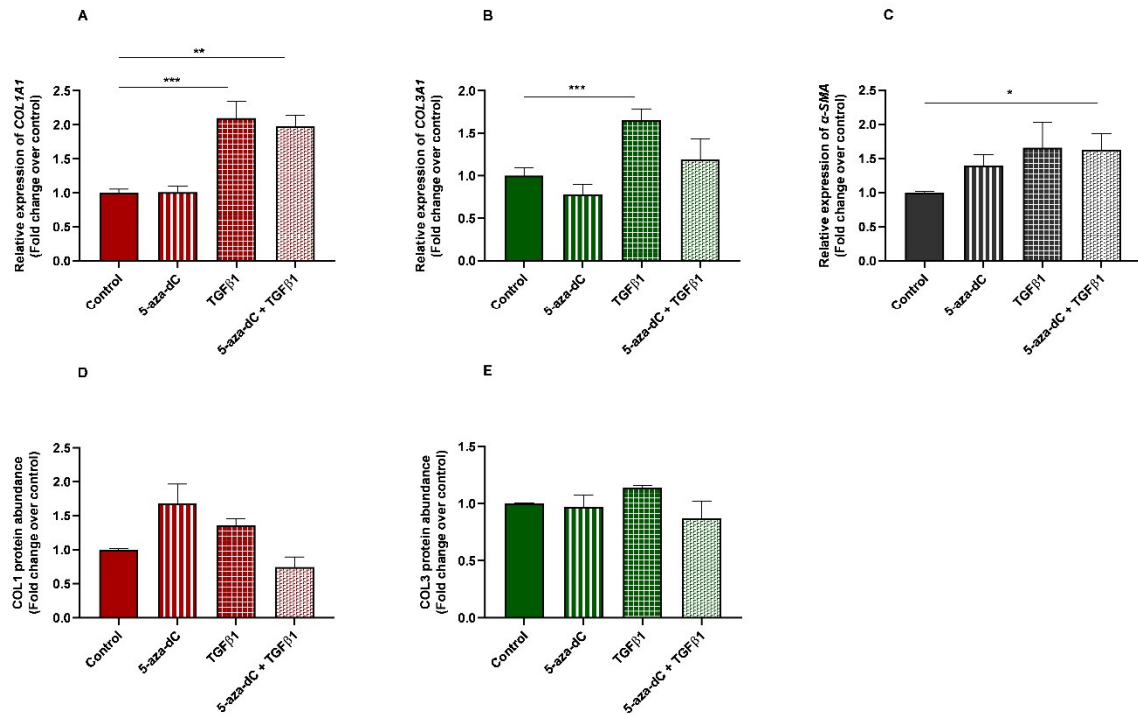

**Figure S2.** Relative levels of **A)** collagen type I (*COL1A1*), **B)** collagen type III (*COL3A1*), and **C)**  $\alpha$ -smooth muscle actin ( $\alpha$ -SMA) mRNA, and of **D)** COL1 and **E)** COL3 protein concentrations in non-treated (control) endometrial fibroblasts or treated with 5-aza-dC (1 μM), TGF-β1 (10 ng/mL) or TGF-β1 (10 ng/mL) + 5-aza-dC (1 μM) for 48h. Each treatment was compared to respective control (all groups with control C and TGF-β1+5-aza-dC with TGF-β1);  $n=5$ . Bars represent mean $\pm$ SEM. Asterisks indicate significant differences between treatments (\* $P<0.05$ , \*\* $P<0.01$ , \*\*\* $P<0.001$ ).

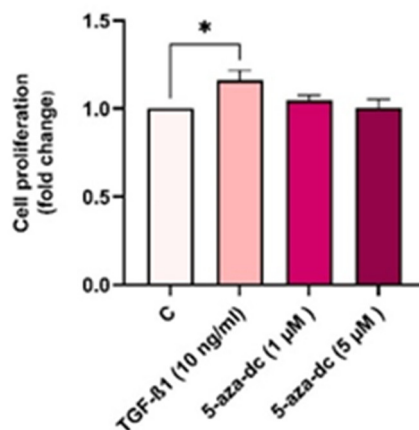

**Figure S3.** Effect of TGF-β1 at a dose of 10 ng/mL and 5-aza-dC at doses of 1 μM and 5 μM on cell viability,  $n=4$ . Bars represent mean $\pm$ SEM. Asterisks indicate significant differences between treatment (\* $P<0.05$ ). C-control (no factors added to the culture medium).
